# Supplementary material for: Addressing Challenges When Applying GRADE to Public Health Guidelines: A Scoping Review Protocol and Pilot Analysis
Source: MDPI journal article supplement (doi:10.3390/ijerph19020992), 2022-01-16
Supplement: s1 [file s1]

## Supplementary Material

Table S1: Screening questions

|                               |                                                                          |                                                                                                                                                                                  |                                                                                                                                      |                                                                                    |                                                                                                        |
|-------------------------------|--------------------------------------------------------------------------|----------------------------------------------------------------------------------------------------------------------------------------------------------------------------------|--------------------------------------------------------------------------------------------------------------------------------------|------------------------------------------------------------------------------------|--------------------------------------------------------------------------------------------------------|
| Is the document a guideline?  | Did the guideline use the GRADE approach for developing recommendations? | Did the guideline provide evidence-to-decision (EtD) tables or an equivalent (e.g. all EtD sections covered, but only provided in a narrative way in the text of the guideline)? | Is the guideline an original main document? (e.g. it is not an annex, it is not one part of a range of guidelines on the same topic) | Is the guideline a public health guideline (see protocol for detailed definition)? | Does the guideline cover screening topics? (At least 50% of recommendations are related to screening.) |
| Yes – include<br>No - exclude | Yes – include<br>No - exclude                                            | Yes – include<br>No - exclude                                                                                                                                                    | Yes – include<br>No – look for the main document                                                                                     | Yes – include<br>No - exclude                                                      | Yes – include as a screening guideline<br>No – include                                                 |

Table S2: Data extraction instrument

|                                                                                                                                                                                   |
|-----------------------------------------------------------------------------------------------------------------------------------------------------------------------------------|
| Purpose (scope) of the guideline, including remit of the organisation (if stated)                                                                                                 |
| Target audience (who will use the guidelines, who is it for)                                                                                                                      |
| How were stakeholders for the guideline identified?                                                                                                                               |
| How were outcomes identified and prioritized?                                                                                                                                     |
| Was the GRADE approach to prioritizing outcomes used?                                                                                                                             |
| Were there any non-health outcomes? (examples: academic achievement, job satisfaction)                                                                                            |
| How did the panel/guideline development group decide on thresholds for decision-making (or minimal important difference, or important thresholds)? How were findings interpreted? |
| How did the panel/group assess the overall certainty of evidence?                                                                                                                 |
| What consensus methods were used to agree on the recommendations and their strength?                                                                                              |
| How many recommendations were based on high/moderate/low/very low certainty of evidence respectively?                                                                             |
| Were there any strong recommendations based on low or very low certainty of evidence?                                                                                             |
| Were there any good practice statements in the guideline (or any formally approved statements other than recommendations)?                                                        |
| What study designs were included in the guideline? (examples: only RCTs, any type of study)                                                                                       |
| Were non-randomized controlled studies (NRS) used in the guideline?                                                                                                               |
| Was there moderate or high certainty of evidence based on NRS/observational studies?                                                                                              |
| Was evidence from RCTs and NRS/observational studies pooled together in GRADE tables?                                                                                             |
| Did NRS or observational studies start at high certainty of evidence and then downgraded?                                                                                         |
| Were there any methodological concerns and/or challenges noted by guideline authors?                                                                                              |
| Were there any modifications made to the GRADE approach, and how were they justified?                                                                                             |

Abbreviations: RCT – randomized controlled trial; NRS – non-randomized studies of interventions, EtD – evidence-to-decision framework
